# Supplementary material for: Impact of SDS surfactant on the interactions of Cu2+ions with the amyloidogenic region of human prion protein
Source: Royal Society of Chemistry journal article supplement (doi:10.1039/c5dt01488c), 2015-01-01
Supplement: c5dt01488c1.pdf [file c5dt01488c1.pdf]

## **Impact of SDS surfactant on the interactions of Cu<sup>2+</sup> ions with amyloidogenic region of human prion protein.**

*Aleksandra Hecel<sup>a</sup>, Caterina Migliorini<sup>b</sup>, Daniela Valensin,<sup>b\*</sup> Marek Luczkowski,<sup>a</sup> and Henryk Kozłowski<sup>a\*</sup>*

*<sup>a</sup>Faculty of Chemistry, University of Wrocław, F. Joliot-Curie 14, 50383 Wrocław, Poland,*

*henryk.kozlowski@chem.uni.wroc.pl*

*<sup>b</sup>Department of Chemistry, University of Siena, via A. de Gaspari 2, 53100 Siena, Italy,*

*daniela.valensin@unisi.it*

### **Supplementary Material**

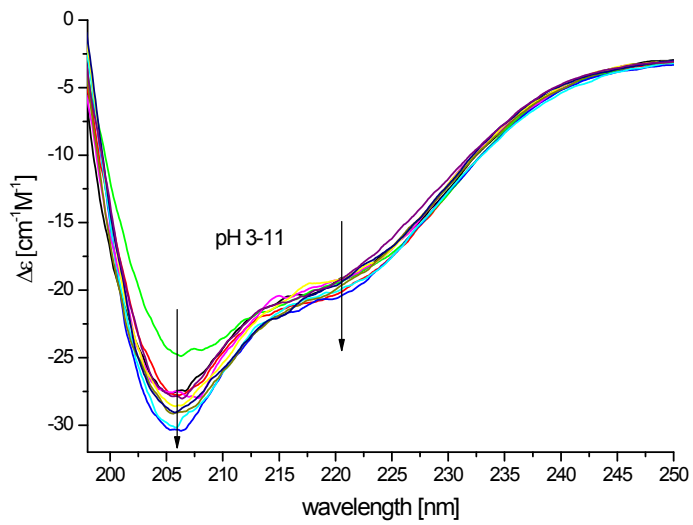

Figure 1S. CD spectra of hPrP91-127 at pH 3-11 in 40.0 mM SDS solutions in 0.01cm quartz cell.
